1  
2 **Absence of SARS-CoV-2 neutralizing activity in pre-pandemic sera from**  
3 **individuals with recent seasonal coronavirus infection**

4  
5  
6 Daniel Poston<sup>1,2</sup>, Yiska Weisblum<sup>1</sup>, Helen Wise<sup>3</sup>, Kate Templeton<sup>3</sup>, Sara Jenks<sup>3</sup>, Theodora  
7 Hatziiioannou<sup>1</sup>, Paul Bieniasz<sup>1,4</sup>.

- 8  
9  
10  
11  
12 1. Laboratory of Retrovirology, The Rockefeller University, 1230 York Avenue, New York  
13 NY 10065  
14 2. Weill Cornell/Rockefeller/Sloan-Kettering Tri-Institutional MD-PhD Program, 1300  
15 York Avenue, New York NY 10021  
16 3. Royal Infirmary of Edinburgh, NHS Lothian, 51 Little France Crescent, Edinburgh EH16  
17 4SA  
18 4. Howard Hughes Medical Institute, The Rockefeller University, 1230 York Avenue, New  
19 York NY 10065  
20

21 Keywords COVID19, SARS-CoV-2, Seasonal coronavirus, antibodies, neutralization  
22

23  
24 Running title: SARS-CoV-2 neutralization  
25

26 Correspondence to:

27 Paul D. Bieniasz, Laboratory of Retrovirology, The Rockefeller University, 31 1230 York  
28 Avenue, New York, NY, 10065. E-mail [pbieniasz@rockefeller.edu](mailto:pbieniasz@rockefeller.edu)  
29

30 Theodora Hatziiioannou, Laboratory of Retrovirology, The Rockefeller University, 31 1230 York  
31 Avenue, New York, NY, 10065. E-mail [thatziio@rockefeller.edu](mailto:thatziio@rockefeller.edu)  
32  
33

34 **Abstract**

35 Cross-reactive immune responses elicited by seasonal coronaviruses might impact SARS-CoV-2  
36 susceptibility and disease outcomes. We measured neutralizing activity against SARS-CoV-2 in  
37 pre-pandemic sera from patients with prior PCR-confirmed seasonal coronavirus infection.  
38 While neutralizing activity against seasonal coronaviruses was detected in nearly all sera, cross-  
39 reactive neutralizing activity against SARS-CoV-2 was undetectable.

40

41

## 42 **Introduction**

43 Since the initial description in December 2019 of a novel human coronavirus SARS-CoV-2,  
44 there has been a global effort to identify underlying the underlying causes for the great range of  
45 disease severity observed, from mild or even asymptomatic infection to severe respiratory  
46 distress and death. One hypothesis is that cross reactive immune responses, elicited by prior  
47 infection with seasonal coronaviruses impacts the course of SARS-CoV-2 infection, perhaps  
48 providing a degree of protection against severe COVID-19 disease.

49  
50 The endemic seasonal human coronaviruses (HCoVs)—HCoV-HKU1, HCoV-OC43, HCoV-  
51 NL63, and HCoV-229E—cause, mild or subclinical respiratory infections, with severe disease  
52 being exceptionally rare [1]. Although there is low overall sequence homology between the  
53 SARS-CoV-2 Spike (S) protein and those of the endemic HCoVs, overlapping T-cell epitopes  
54 have been reported, particularly in the S2 subunit [2,3]. It is possible that neutralizing antibodies  
55 induced by seasonal HCoV infection could cross-react with similar epitopes in SARS-CoV-2 S.  
56 Such antibodies could potentially afford some level of protection against and perhaps contribute  
57 to the wide range of outcomes of SARS-CoV-2 infection. To investigate this possibility, we  
58 analyzed sera that had been collected prior to the COVID-19 pandemic from patients with a  
59 recent PCR-confirmed diagnosis of HCoV-OC43, HCoV-NL63, or HCoV-229E infection. Such  
60 samples should contain neutralizing antibodies against the respective seasonal HCoV, without  
61 the possibility of prior SARS-CoV-2 infection, allowing us to specifically test whether  
62 antibodies elicited by seasonal HCoV infection can neutralize SARS-CoV-2. Our results indicate  
63 a lack of SARS-CoV-2 cross-neutralization activity between the seasonal HCoVs and SARS-  
64 CoV-2.

65

## 66 **Methods**

67 *Identification of Patient Samples:* The thirty-seven prepandemic serum samples selected for  
68 inclusion in this study were all collected as part of routine clinical care prior to 2020 from  
69 patients in Edinburgh, Scotland, effectively excluding the possibility of prior SARS-CoV-2  
70 infection. All samples were from symptomatic inpatients with PCR-confirmed diagnosis of  
71 HCoV-OC43, HCoV-NL63, or HCoV-229E infection, 11-291 days prior to collection of the  
72 serum sample. Ten positive control COVID-19 serum samples were collected in April-May 2020  
73 from patients with mildly symptomatic, PCR-diagnosed SARS-CoV-2 infection, 24-61 days  
74 prior to serum collection. All samples were anonymized and ethical approval to utilize these  
75 patient samples was obtained through the NHS Lothian BioResource and the Rockefeller  
76 University IRB

77

78 *Viruses:* The seasonal coronaviruses HCoV-OC43 (ATCC VR-759) and HCoV-229E (ATCC  
79 VR-740) were obtained from Zeptomatrix, and HCoV-NL63 (Amsterdam I) was obtained from  
80 BEI resources. Viral stocks were generated by propagation on Huh7.5 cells. The replication-  
81 competent chimeric recombinant vesicular stomatitis virus encoding SARS-CoV-2 Spike and  
82 GFP (rVSV/SARS-2/GFP<sub>2E1</sub>) has been described previously and was propagated on  
83 293T/ACE2cl.22 cells [4].

84

85 *Neutralization assays:* Sera were initially diluted 1:12.5, and then serially diluted 5-fold over 7  
86 dilutions in 96 well plates. Thereafter, approximately  $4 \times 10^3$  infectious units of either  
87 rVSV/SARS-2/GFP, HCoV-OC43, HCoV-NL63, or HCoV-229E were mixed with the serum

88 dilutions and incubated at 37°C for 1 hour. Virus serum mixtures were subsequently transferred  
89 to 96-well plates containing  $1 \times 10^4$  293T/ACE2cl.22 (for rVSV/SARS-2/GFP and HCoV-OC43)  
90 or HT1080/ACE2cl.14 (for HCoV-NL63 and HCoV-229E) target cells/well. Infection was  
91 allowed to proceed for 16 hours (rVSV/SARS-2) or 24 hours (HCoV-OC43, HCoV-NL63,  
92 HCoV-229E). The numbers of rVSV/SARS-2/GFP was assessed by flow cytometric detection of  
93 GFP expression as described previously [4]. For HCoV-OC43, HCoV-NL63, and HCoV-229E,  
94 cells were trypsinized and immunostained to detect nucleoprotein antigen expression in infected  
95 cells. For HCoV-OC43, Sigma MAB9013 was used, for HCoV-NL63, Eurofins  
96 M.30.HCoV.B2D4 was used, for HCoV-229E: Eurofins M.30.HCoV.B1E7 was used. A secondary  
97 antibody conjugate Alexa Fluor® 488 Goat anti-Mouse IgG (H+L) (Thermo) was then used to  
98 and infected cells enumerated by flow cytometry.

99

100 *Data analysis:* All flow cytometry data was analyzed using FlowJo software version 10.6.1. All  
101 graphs and corresponding  $NT_{50}$  values were generated using GraphPad Prism version 8.

102

## 103 **Results**

104 To assess whether prior infection by seasonal coronaviruses could elicit antibodies with  
105 neutralization activity against SARS-CoV-2, we identified 37 serum samples collected prior to  
106 the COVID19 pandemic from patients who were diagnosed using PCR with a seasonal  
107 coronavirus 11-291 days (median 80 = days) prior to serum sample collection. Of these 20 were  
108 diagnosed with HCoV-OC43 infection, 10 were diagnosed with HCoV-NL63 infection and 7  
109 were diagnosed with HCoV-229E infection. We also developed flow cytometry-based  
110 coronavirus neutralization assays based on the detection of nucleocapsid expression in HCoV-

111 OC43, HCoV-NL63, or HCoV-229E infected cells. Using these neutralization assays, we  
112 confirmed that neutralizing antibodies targeting the seasonal coronaviruses were present in the  
113 pre-pandemic samples. Indeed, all sera from individuals diagnosed with recent infection by a  
114 seasonal coronavirus neutralized that same virus. Nevertheless, the neutralization titers varied  
115 between viruses. For example, while samples collected from HCoV-OC43 infected individuals  
116 typically exhibited potent neutralization of HCoV-OC43, sera collected from HCoV-229E  
117 infected individuals had comparatively weak neutralization activity against HCoV-229E. Most  
118 sera exhibited neutralizing activity against multiple seasonal coronaviruses. Indeed, some  
119 samples collected individuals with recent HCoV-229E infection neutralized HCoV-OC43 with  
120 higher titers than HCoV-229E. Collectively, 73% of samples had an  $NT_{50} > 500$  for HCoV-  
121 OC43 and while 57% of samples  $NT_{50} > 500$  for HCoV-229E, regardless of the virus detected at  
122 the time of sample collection. Neutralizing activity against HCoV-NL63 was typically of lower  
123 titer. Nevertheless all but one serum sample from individuals with recently diagnosed HCoV-  
124 NL63 infection had neutralizing activity against HCoV-NL63 with  $NT_{50}$  values of  $>1:50$ .  
125 Overall, this collection of serum samples had extensive neutralizing activity against several  
126 seasonal coronaviruses including, particularly, the betacoronavirus HCoV-OC43, that is the most  
127 closely related to SARS-CoV-2 of the viruses tested. Indeed, some of the sera had potent  
128 neutralizing activity against HCoV-OC43 with  $NT_{50}$  values in excess of 10,000.

129  
130 In contrast, none of the very same 37 serum samples tested had any detectable neutralization  
131 activity against rVSV/SARS-CoV-2/GFP. Importantly, rVSV/SARS-CoV-2/GFP is at least as,  
132 or more, sensitive to neutralization by COVID-19 plasma analysis as SARS-CoV-2 [4]. Indeed,  
133 sera collected from ten individuals with recently diagnosed SARS-CoV-2 infection could

134 neutralize rVSV/SARS-CoV-2/GFP with NT<sub>50</sub> values ranging from 96 to 5400. Overall these  
135 data strongly suggest that only pandemic sera, and not pre-pandemic sera have neutralizing  
136 activity against SARS-CoV-2, and further suggest that pre-existing serological immunity to  
137 seasonal coronaviruses is not a major driver of the diverse outcome of SARS-CoV-2 infection.

138

## 139 **Discussion**

140 These data demonstrate that neutralization activity against seasonal coronaviruses is nearly  
141 ubiquitous in sera collected from individuals with PCR-confirmed pre-pandemic seasonal  
142 coronavirus infection. Indeed, most sera had neutralizing activity against multiple seasonal  
143 coronaviruses and some sera had greater neutralization potency against different coronaviruses  
144 than the one detected at the time of sample collection. This may be due to inherent differences in  
145 neutralization sensitivity among the seasonal coronaviruses, and is most likely the result of prior,  
146 undocumented infection with different seasonal coronaviruses. That we observed more potent  
147 antibody responses to HCoV-OC43 and regardless of PCR result may suggest recent infection  
148 with this virus is more common, which is in line with previous observations suggesting that  
149 reinfection with HCoV-OC43 and HCoV-229E occurs at a greater frequency than HCoV-  
150 NL63[5–8] and that infection with HCoV-OC43 is common this geographic locale.

151 While we cannot exclude the possibility that that seasonal coronavirus elicit cross-neutralizing  
152 antibodies, the divergence between seasonal coronaviruses S proteins would suggest limited  
153 cross reactivity (HCoV-OC43 S shares 22.6 and 24.5% identical amino acids with and HCoV-  
154 229E and HCoV-NL63 S respectively, while HCoV-NL63 and HCoV-229E S share 55%  
155 identical amino acids) Accordingly, none of the samples tested had any neutralization activity  
156 against SARS-CoV-2 whose spike protein shares 24%-29% amino acid identity with the seasonal

157 coronaviruses. In agreement with the notion that there is little cross reactivity between seasonal  
158 HCoV neutralizing antibodies and SARS-CoV-2, many of the monoclonal antibodies cloned  
159 from SARS-CoV-2 infected individuals contain very low levels of somatic hypermutation [9],  
160 suggesting that they arise from *de novo* rather than recall B-cell responses. However, instances of  
161 cross-reactive antibodies with high levels of somatic hypermutation have been reported,  
162 indicating that in some cases memory B cells evoked by prior seasonal HCoV infection may be  
163 recalled during infection with a SARS-like coronavirus [10].

164 While other groups have reported the existence of SARS-CoV-2 cross-reactive neutralizing  
165 antibodies in sera from individuals that were not infected SARS-CoV-2, the neutralization  
166 activity observed appears low [11,12]. Unlike other reports the pre-pandemic sera used in our  
167 study that have undetectable neutralization activity against SARS-CoV-2 can neutralize seasonal  
168 HCoVs, in some cases quite potently. While it is possible that there are rare instances of  
169 individuals possessing antibodies from prior seasonal HCoV infection may be able to also target  
170 SARS-CoV-2 S, our data argues against a broad role for pre-existing protective humoral  
171 immunity against SARS-CoV-2.

172

### 173 **Author Contributions**

174 HW, SJ, YW, TH, and PDB conceived and designed the study. DP performed the neutralization  
175 assays. DP, TH, and PDB wrote the manuscript with input from all authors.

176

### 177 **Funding**

178 This work was supported by the NHS and Grants from the National Institutes of Allergy and  
179 Infectious Diseases R37AI640003 (to PDB) and R01AI078788 (to TH). DP was supported by a



180 Medical Scientist Training Program grant from the National Institute of General Medical  
181 Sciences of the National Institutes of Health under award number T32GM007739 to the Weill  
182 Cornell/Rockefeller/Sloan Kettering Tri-Institutional MD-PhD Program. The funders played no  
183 role in the design, analysis or reporting of this research.

184

## 185 **Bibliography**

186

- 187 1. Su S, Wong G, Shi W, et al. Epidemiology, genetic recombination, and pathogenesis of  
188 coronaviruses. *Trends Microbiol.* **2016**; 24:490–502.
- 189 2. Braun J, Loyal L, Frentsch M, et al. SARS-CoV-2-reactive T cells in healthy donors and  
190 patients with COVID-19. *Nature* **2020**;
- 191 3. Shrock E, Fujimura E, Kula T, et al. Viral epitope profiling of COVID-19 patients reveals  
192 cross-reactivity and correlates of severity. *Science* **2020**;
- 193 4. Schmidt F, Weisblum Y, Muecksch F, et al. Measuring SARS-CoV-2 neutralizing  
194 antibody activity using pseudotyped and chimeric viruses. *J. Exp. Med.* **2020**; 217.
- 195 5. Edridge AWD, Kaczorowska J, Hoste AC, et al. Seasonal coronavirus protective  
196 immunity is short-lasting. *Nat. Med.* **2020**;
- 197 6. Gorse GJ, Donovan MM, Patel GB, Balasubramanian S, Lusk RH. Coronavirus and Other  
198 Respiratory Illnesses Comparing Older with Young Adults. *Am. J. Med.* **2015**;  
199 128:1251.e11-20.
- 200 7. Dijkman R, Jebbink MF, Gaunt E, et al. The dominance of human coronavirus OC43 and  
201 NL63 infections in infants. *J. Clin. Virol.* **2012**; 53:135–139.
- 202 8. Gaunt ER, Hardie A, Claas ECJ, Simmonds P, Templeton KE. Epidemiology and clinical  
203 presentations of the four human coronaviruses 229E, HKU1, NL63, and OC43 detected  
204 over 3 years using a novel multiplex real-time PCR method. *J. Clin. Microbiol.* **2010**;  
205 48:2940–2947.
- 206 9. Robbiani DF, Gaebler C, Muecksch F, et al. Convergent antibody responses to SARS-  
207 CoV-2 in convalescent individuals. *Nature* **2020**; 584:437–442.
- 208 10. Wec AZ, Wrapp D, Herbert AS, et al. Broad neutralization of SARS-related viruses by  
209 human monoclonal antibodies. *Science* **2020**; 369:731–736.
- 210 11. Song G, He W, Callaghan S, et al. Cross-reactive serum and memory B cell responses to  
211 spike protein in SARS-CoV-2 and endemic coronavirus infection. *BioRxiv* **2020**;
- 212 12. Ng K, Faulkner N, Cornish G, et al. Pre-existing and de novo humoral immunity to SARS-  
213 CoV-2 in humans. *BioRxiv* **2020**;

214

215

216 **Figure legend**

217 **Figure 1 Coronavirus neutralizing activity in sera from individuals with recent coronavirus**  
218 **infection**

219 **(A)** Infection by HCoV-OC43 (blue), HCoV-NL63 (purple) and HCoV-229E (green) in the  
220 presence of the indicated dilutions of pre-COVID-19-pandemic sera, from individuals recently  
221 diagnosed by PCR with HCoV-OC43, HCoV-NL63, or HCoV-229E infection, as indicated.  
222 Infected cells were enumerated by flow cytometry and the number of infected cells is plotted a  
223 percentage of the number of infected cells (~30%) obtained in the absence of serum.

224

225 **(B)** Infection by rVSV/SARS-CoV-2 in the presence of the indicated dilutions of pre-COVID-  
226 19-pandemic sera from individuals recently diagnosed by PCR with HCoV-OC43, HCoV-NL63,  
227 or HCoV-229E infection (left panel), or COVID-19 convalescent sera (right panel). Infected  
228 cells were enumerated by flow cytometry and the number of infected cells is plotted a percentage  
229 of the number of infected cells (~30%) obtained in the absence of serum.

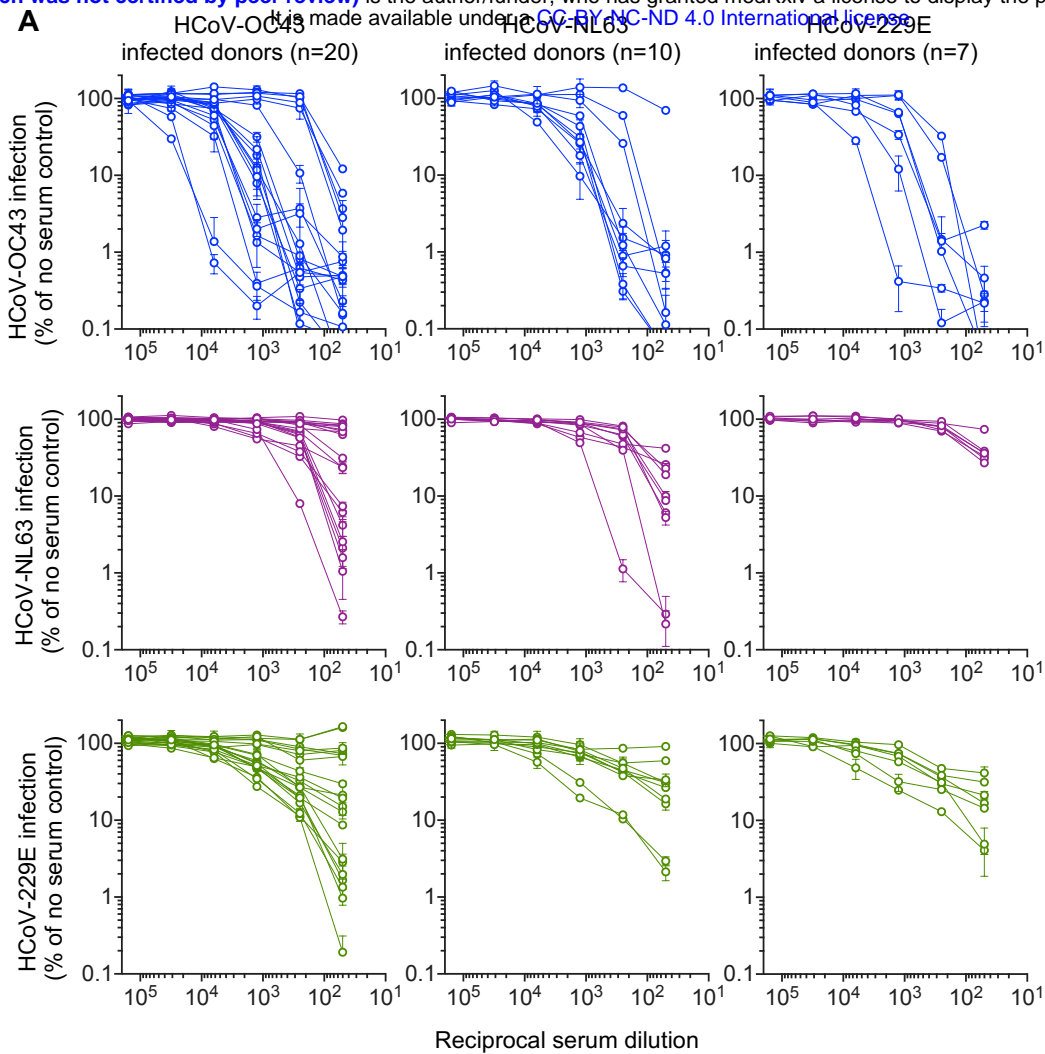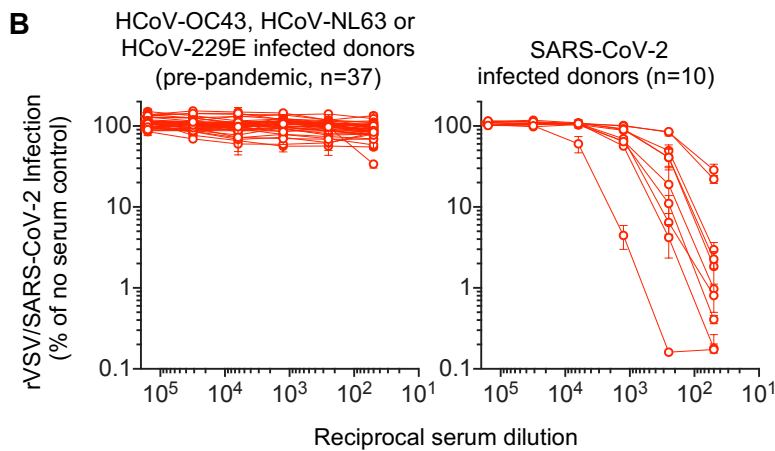

Source: https://medrxiv.org/content/10.1101/2020.10.08.20209650v1.full.pdf
